# Supplementary material for: Ghrelin mediates exercise endurance and the feeding response post-exercise
Source: PubMed Central journal article supplement (PMC5870098; doi:10.1016/j.molmet.2018.01.006), 2018-01-31

# Western blots of gastrocnemius ACC phosphorylation

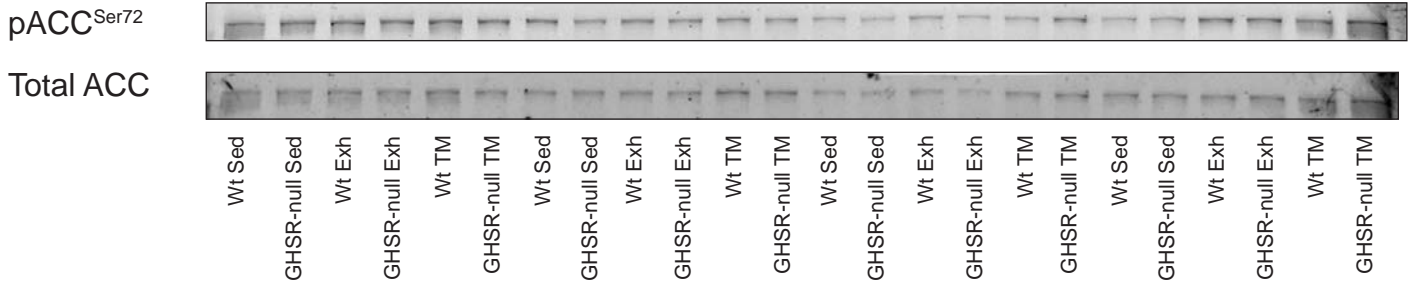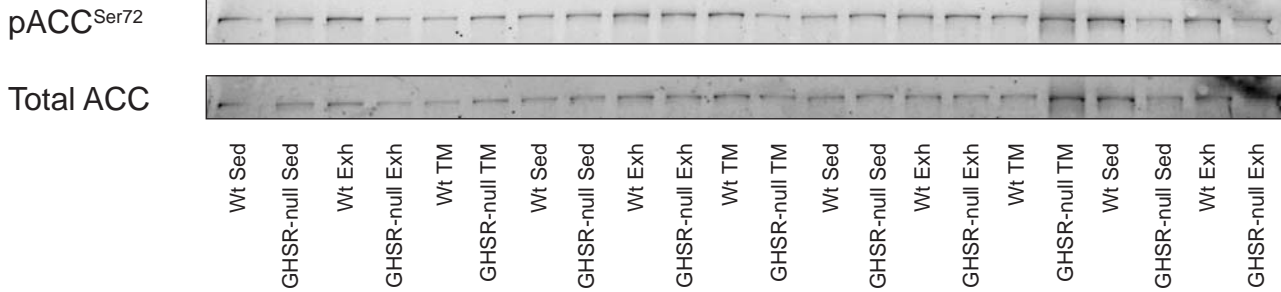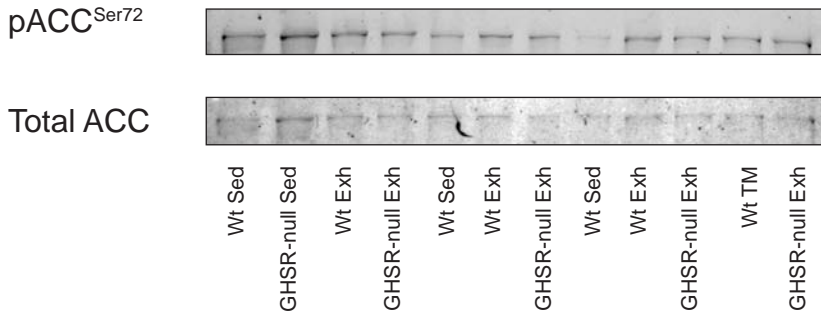

Supplement: mmc1.pdf [file mmc1.pdf]
