# Supplementary material for: Ghrelin mediates exercise endurance and the feeding response post-exercise
Source: PubMed Central journal article supplement (PMC5870098; doi:10.1016/j.molmet.2018.01.006), 2018-01-31
Supplement: mmc3.pdf [file mmc3.pdf]

# Western blots of gastrocnemius COX IV expression

COX IV

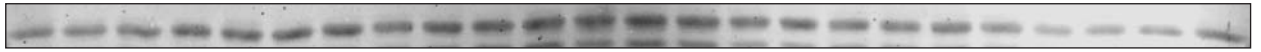

Coomassie stain

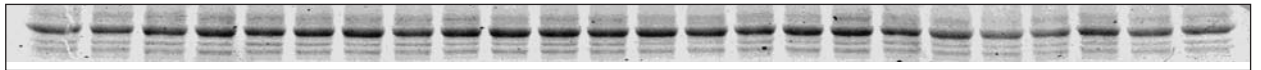

Wt Sed  
GHSR-null Sed  
Wt Exh  
GHSR-null Exh  
Wt TM  
GHSR-null TM  
Wt Sed  
GHSR-null Sed  
Wt Exh  
GHSR-null Exh  
Wt TM  
GHSR-null TM  
Wt Sed  
GHSR-null Sed  
Wt Exh  
GHSR-null Exh  
Wt TM  
GHSR-null TM  
Wt Sed  
GHSR-null Sed  
Wt Exh  
GHSR-null Exh  
Wt TM  
GHSR-null TM

COX IV

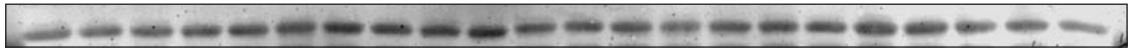

Coomassie stain

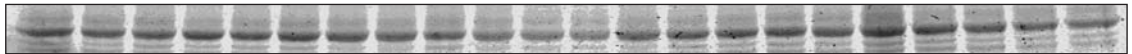

Wt Sed  
GHSR-null Sed  
Wt Exh  
GHSR-null Exh  
Wt TM  
GHSR-null TM  
Wt Sed  
GHSR-null Sed  
Wt Exh  
GHSR-null Exh  
Wt TM  
GHSR-null TM  
Wt Sed  
GHSR-null Sed  
Wt Exh  
GHSR-null Exh  
Wt TM  
GHSR-null TM  
Wt Sed  
GHSR-null Sed  
Wt Exh  
GHSR-null Exh

COX IV

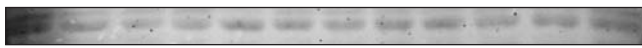

Coomassie stain

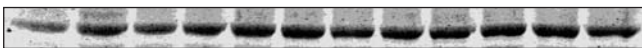

Wt Sed  
GHSR-null Sed  
Wt Exh  
GHSR-null Exh  
Wt Sed  
Wt Exh  
GHSR-null Exh  
Wt Sed  
Wt Exh  
GHSR-null Exh  
Wt TM  
GHSR-null Exh
