# Supplementary material for: Ghrelin mediates exercise endurance and the feeding response post-exercise
Source: PubMed Central journal article supplement (PMC5870098; doi:10.1016/j.molmet.2018.01.006), 2018-01-31

# Supplemental Figure 1

A.

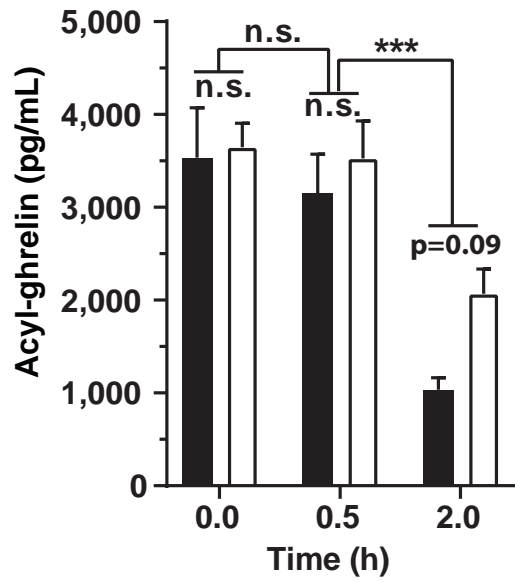

B.

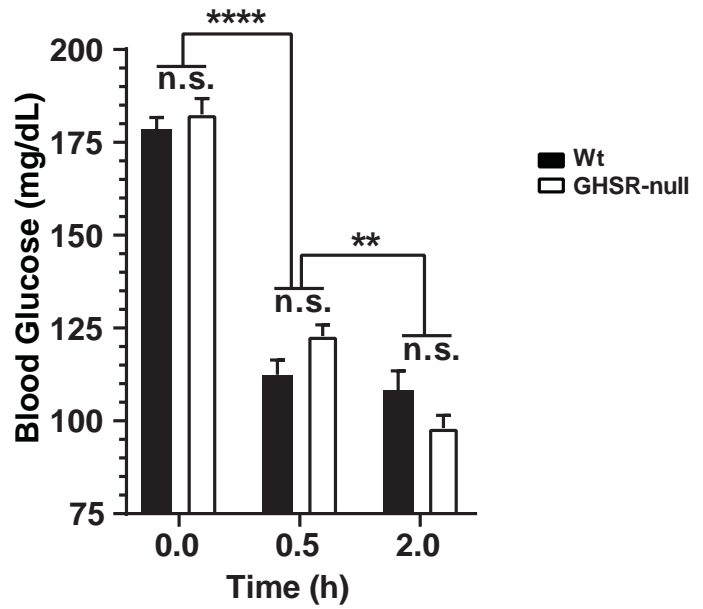

Supplement: mmc4.pdf [file mmc4.pdf]
